# Supplementary material
Source: Frontiers journal article supplement (https://www.frontiersin.org/articles/342363)
Supplement: Presentation_1.pdf [file Presentation_1.pdf]

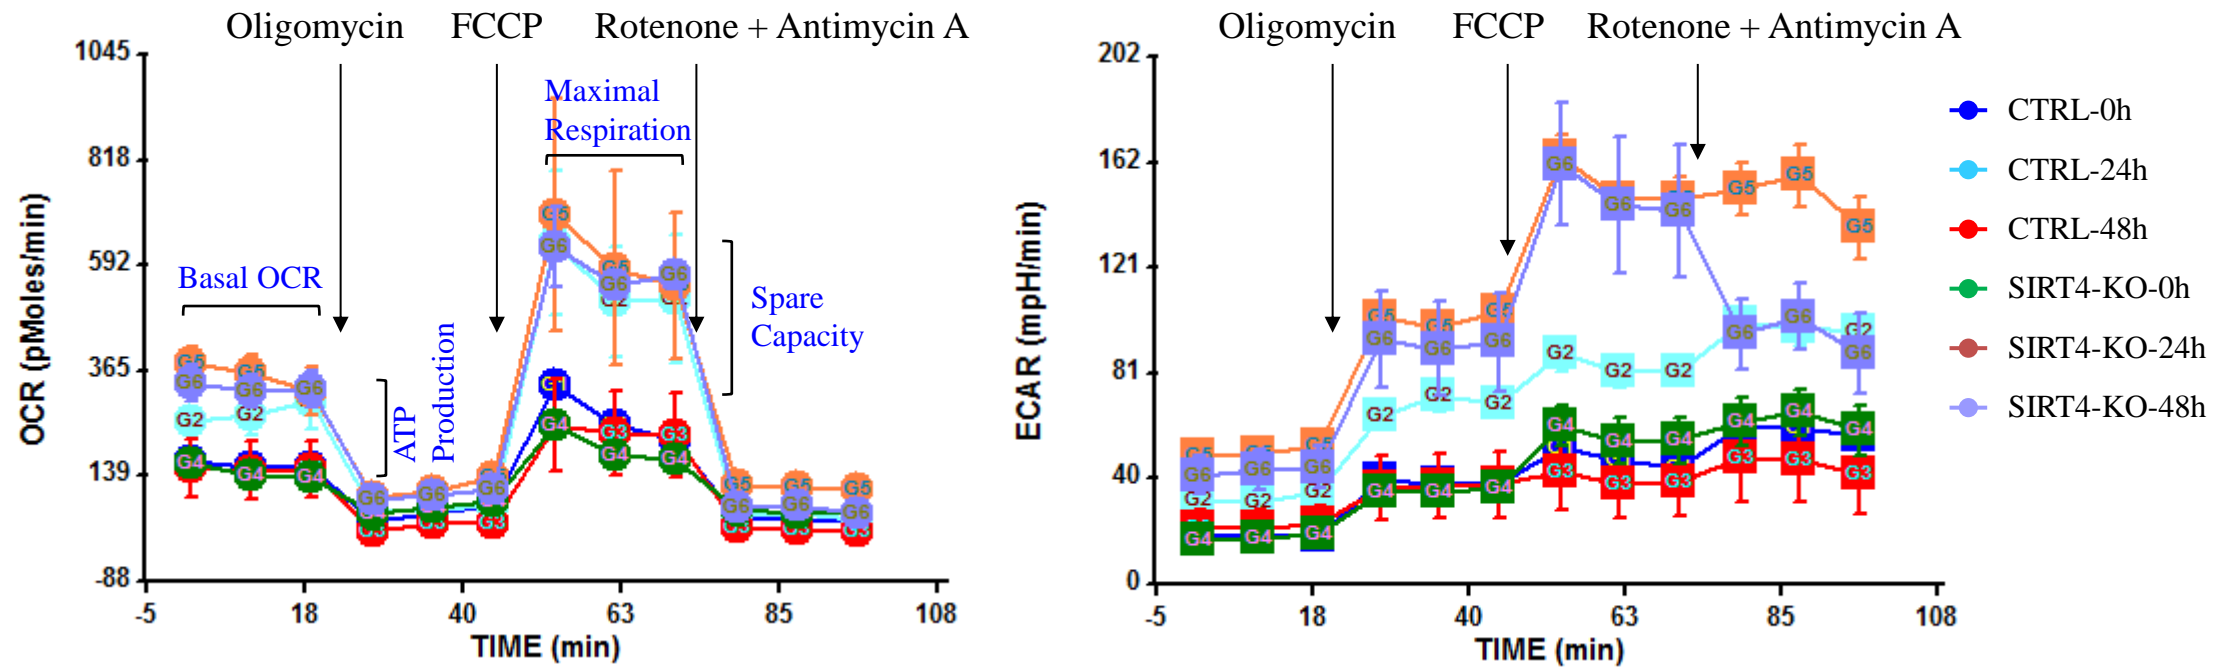

**Supplemental Figure 1:** Depleting SIRT4 impedes restoration of energetic homeostasis during physiologic resolution of acute inflammatory response. Control knockout and SIRT4 knockout THP-1 cells were stimulated with 1  $\mu$ g/ml LPS for 0, 24 or 48 hours, changes of energetics were examined using Seahorse XFe-24 analyzer, the difference of OCR (A) and ECAR in response to LPS stimulation in the presence or absence of SIRT4 was presented as mean values  $\pm$  S.E. of multiple reading points within 8 minute measurements from one of three independent experiments.

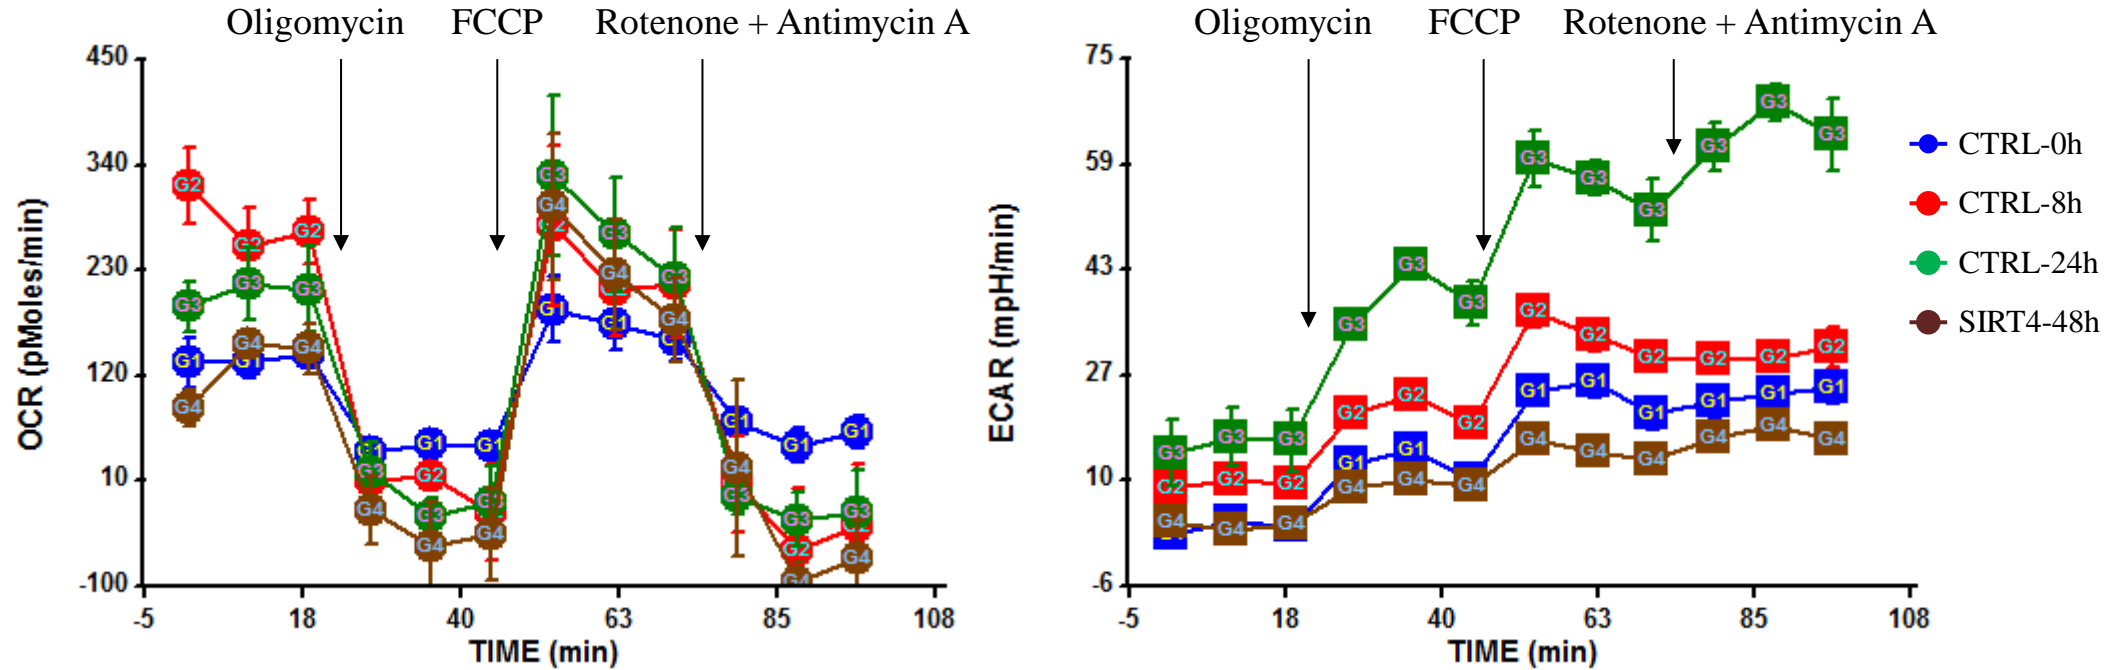

**Supplemental Figure 2:** Mitochondrial bioenergy indices are reprogrammed in human PBMCs during an Acute Inflammatory Response. Healthy peripheral blood mononuclear cells were stimulated with 100 ng/ml LPS for 0, 8, 24, and 48 hours, Cellular energetic changes of OCR and ECAR were evaluated using Seahorse XFe-24 analyzer, data was presented as mean values  $\pm$  S.E. of multiple reading points within 8 minute measurements from one of three independent experiments.
